# Supplementary material for: Bacteria-derived fluorescent carbon dots for microbial live/dead differentiation
Source: Royal Society of Chemistry journal article supplement (doi:10.1039/c6nr06558a), 2016-10-31
Supplement: c6nr06558a1.pdf [file c6nr06558a1.pdf]

## Electronic Supplementary Information

### **Bacteria-derived fluorescent carbon dots for microbial live/dead differentiation**

Xian-Wu Hua,<sup>‡a</sup> Yan-Wen Bao,<sup>‡a</sup> Hong-Yin Wang,<sup>a</sup> Zhan Chen<sup>\*b</sup> and Fu-Gen Wu<sup>\*a</sup>

*<sup>a</sup>State Key Laboratory of Bioelectronics, School of Biological Science and Medical Engineering, Southeast University, Nanjing 210096, P. R. China. E-mail: wufg@seu.edu.cn*

*<sup>b</sup>Department of Chemistry, University of Michigan, 930 North University Avenue, Ann Arbor, Michigan 48109, United States. E-mail: zhanc@umich.edu*

*<sup>‡</sup>Xian-Wu Hua and Yan-Wen Bao have contributed equally to this paper.*

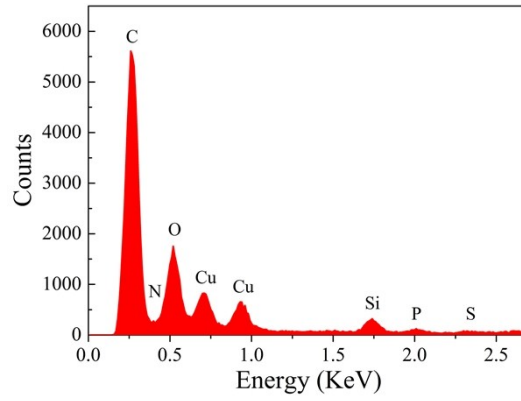

**Fig. S1** The EDS result of CDs-*S. aureus*.

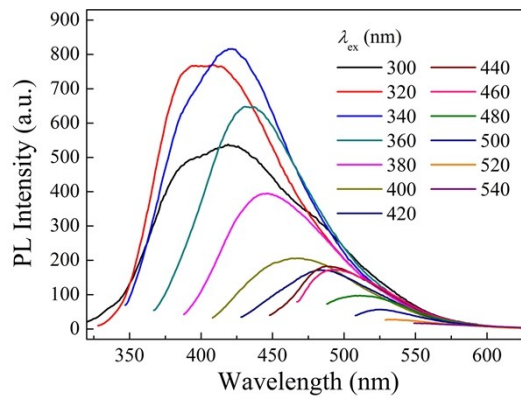

**Fig. S2** Fluorescence emission spectra of CDs-*S. aureus* dispersed in cell PBS solution excited at different wavelengths from 300 to 540 nm with an increment of 20 nm.

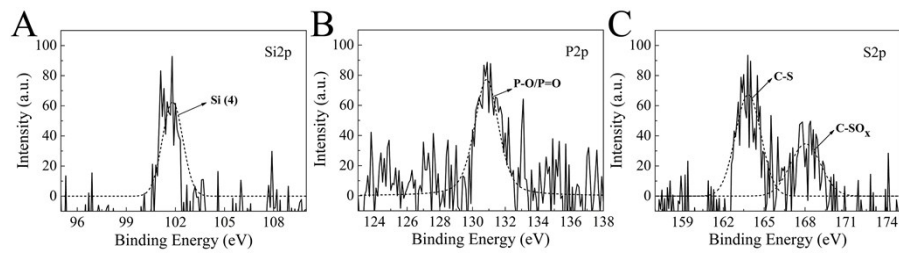

**Fig. S3** The high-resolution XPS peaks of (A) Si2p, (B) P2p and (C) S2p, respectively.

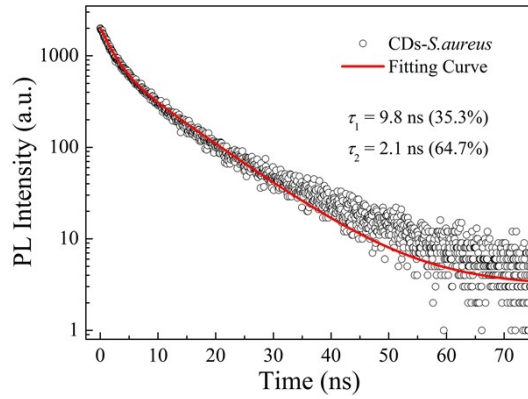

**Fig. S4** The fluorescence decay curve of CDs-*S. aureus*.

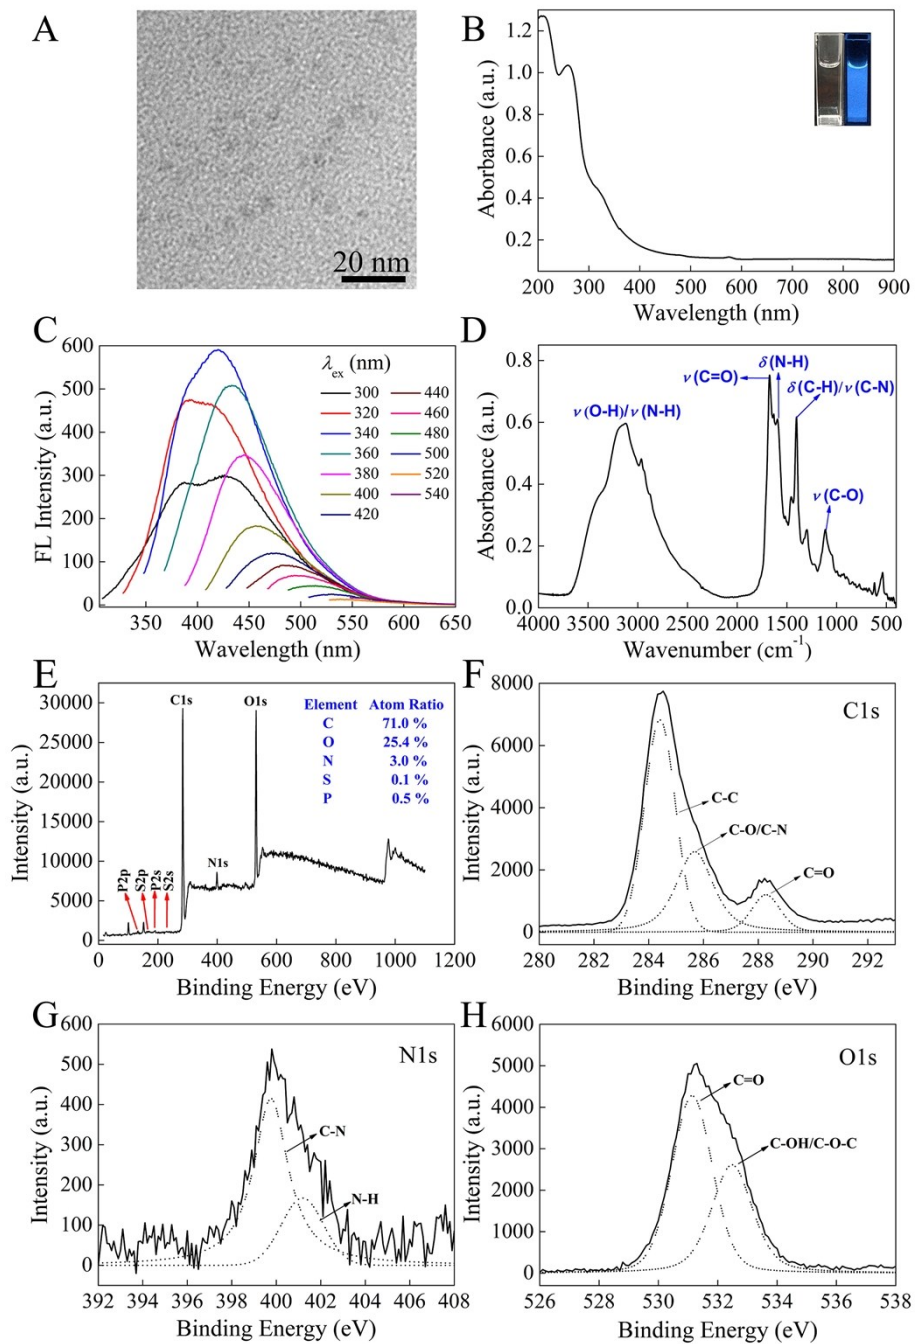

**Fig. S5** Characterizations of CDs-*E. coli*. (A) TEM image of CDs-*E. coli*. (B) UV-vis spectrum of CDs-*E. coli*. Inset shows the CDs irradiated under white light (left) and UV (365 nm) light (right). (C) Fluorescence emission spectra of CDs-*E. coli* excited at different wavelengths from 300 to 540 nm with an increment of 20 nm. (D) FTIR spectrum of CDs-*E. coli*. (E) XPS spectrum of dried CDs-*E. coli*. (F–H) The high-resolution XPS peaks of C1s, N1s and O1s, respectively.

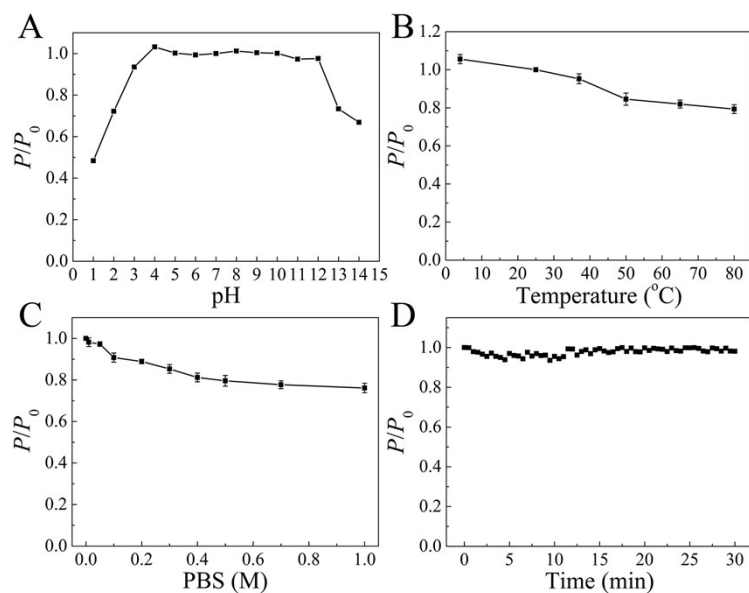

**Fig. S6** PL properties of CDs-*S. aureus* as a function of (A) pH, (B) temperature, (C) ionic strength (different concentrations of PBS solution, pH = 7.4) and UV irradiation time. The PL intensity ( $P$ ) was measured at 416 nm ( $\lambda_{\text{ex}} = 332$  nm).  $P_0$  is the PL intensity of CD solution in the control group (pure water, pH = 7, 25 °C, without laser irradiation).

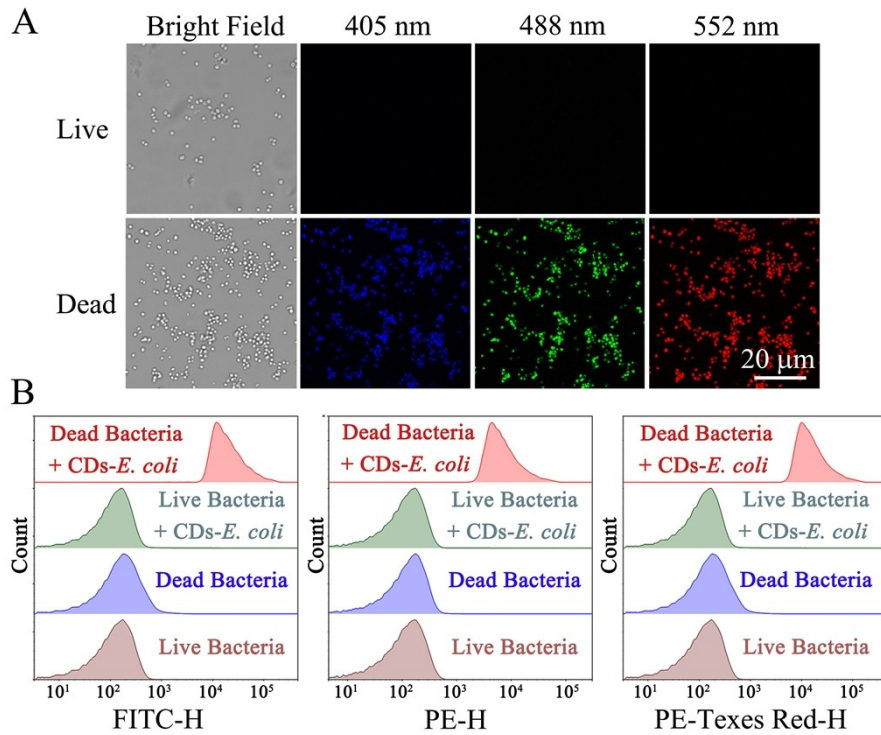

**Fig. S7** The confocal fluorescence images (A) and flow cytometric analyses (B) of live and dead *S. aureus* stained with CDs-*E. coli* for 1 h. Fluorescence images were captured under the excitation of 405, 488 and 552 nm, respectively. Flow cytometric analyses were conducted using three channels of FITC, PE and PE-Texas Red.

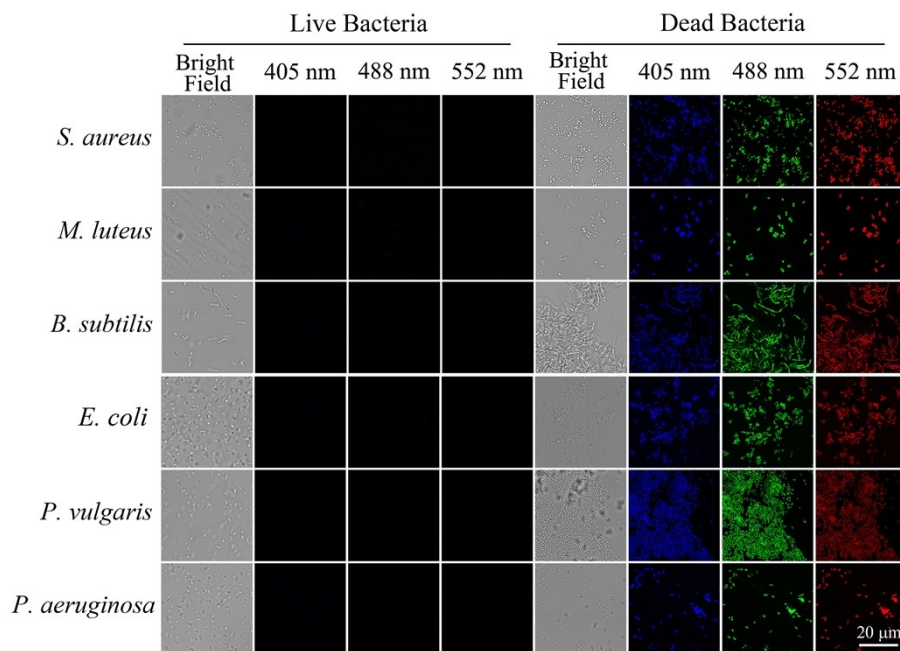

**Fig. S8** Bright field and fluorescence images of live/dead bacteria including two other Gram-

positive bacteria (*M. luteus* and *B. subtilis*) and three Gram-negative bacteria (*E. coli*, *P. vulgaris* and *P. aeruginosa*) stained with CDs-*E. coli*. Fluorescence images were captured upon excitation at 405, 488 and 552 nm, respectively.

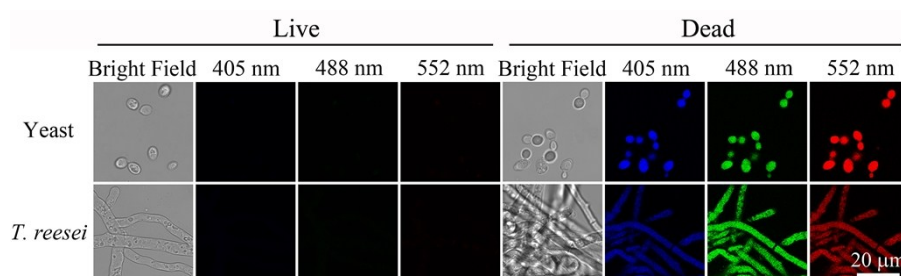

**Fig. S9** Bright field and fluorescence images of live and dead fungal cells (yeast and *T. reesei*) stained with CDs-*E. coli*. Fluorescence images were captured upon excitation at 405, 488 and 552 nm, respectively.

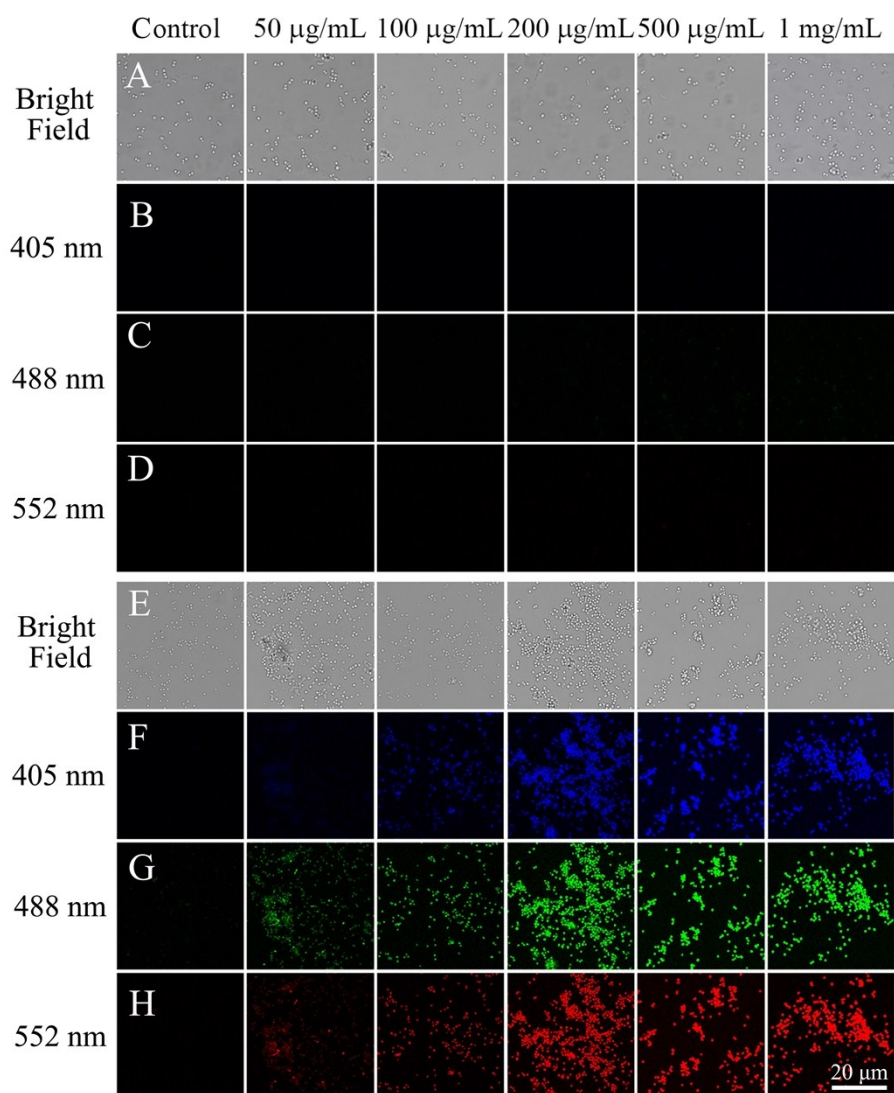

**Fig. S10** Bright and fluorescence images of live and dead *S. aureus* cells stained with CDs-*S. aureus* at various concentrations. Fluorescence images were captured upon excitation at 405, 488 and 552 nm, respectively.

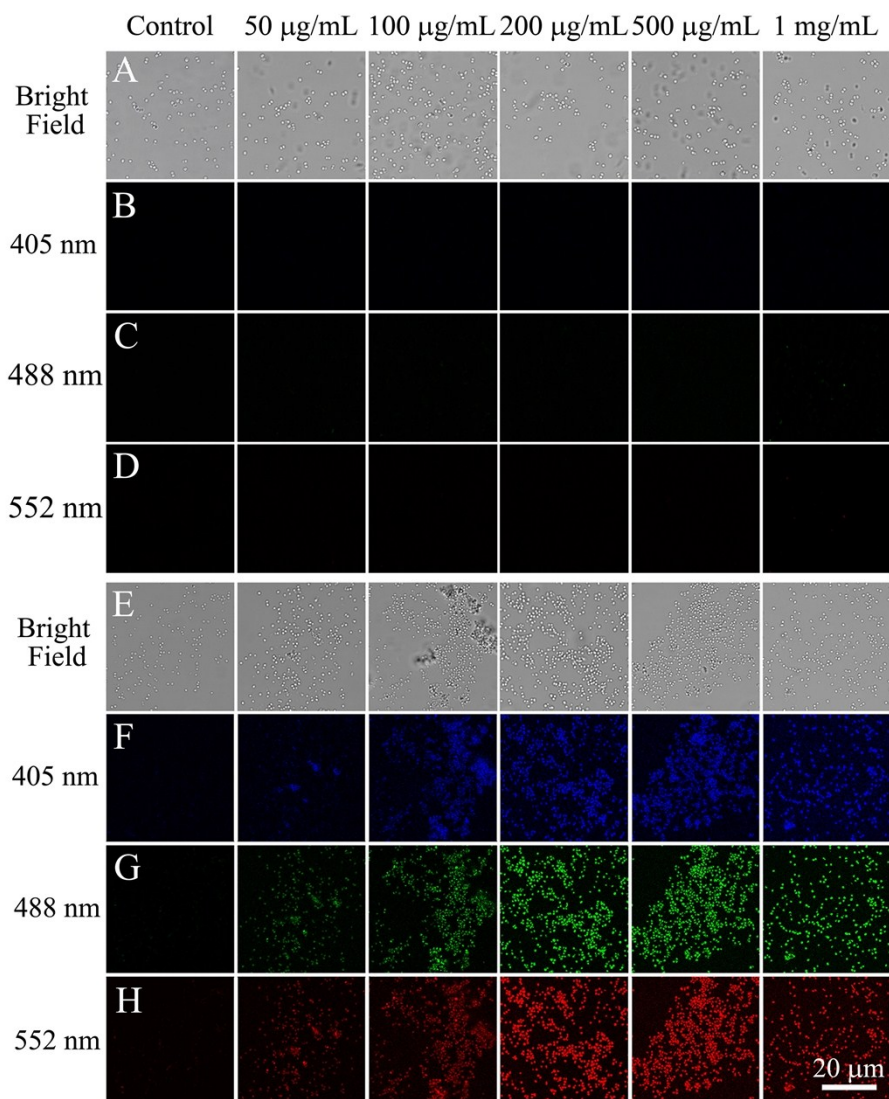

**Fig. S11** Bright and fluorescence images of live and dead *S. aureus* cells stained with CDs-*E. coli* at various concentrations. Fluorescence images were captured upon excitation at 405, 488 and 552 nm, respectively.

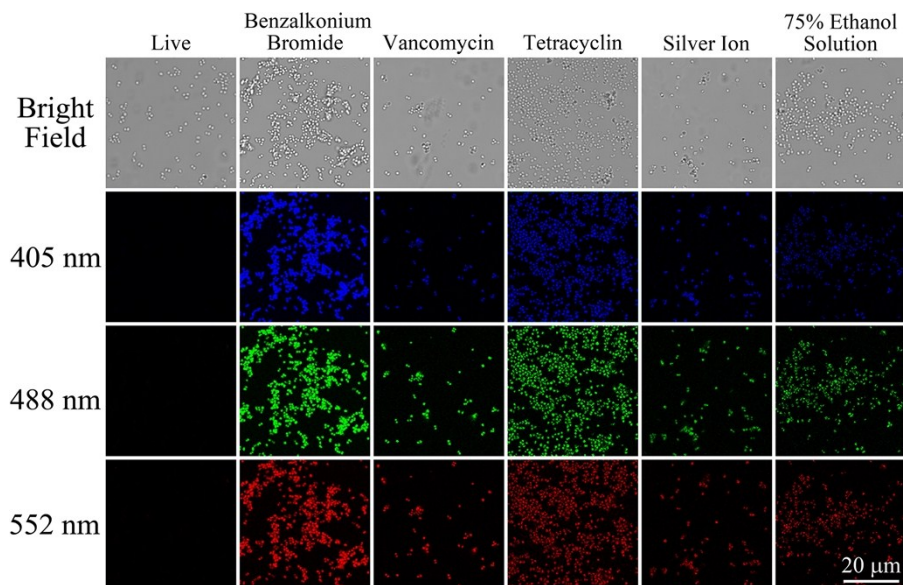

**Fig. S12** Bright field and fluorescence images of CDs-*E. coli* (200  $\mu\text{g}/\text{mL}$ )-stained live *S. aureus* and dead *S. aureus* that were killed in different ways. Fluorescence images were captured upon excitation at 405, 488 and 552 nm, respectively.

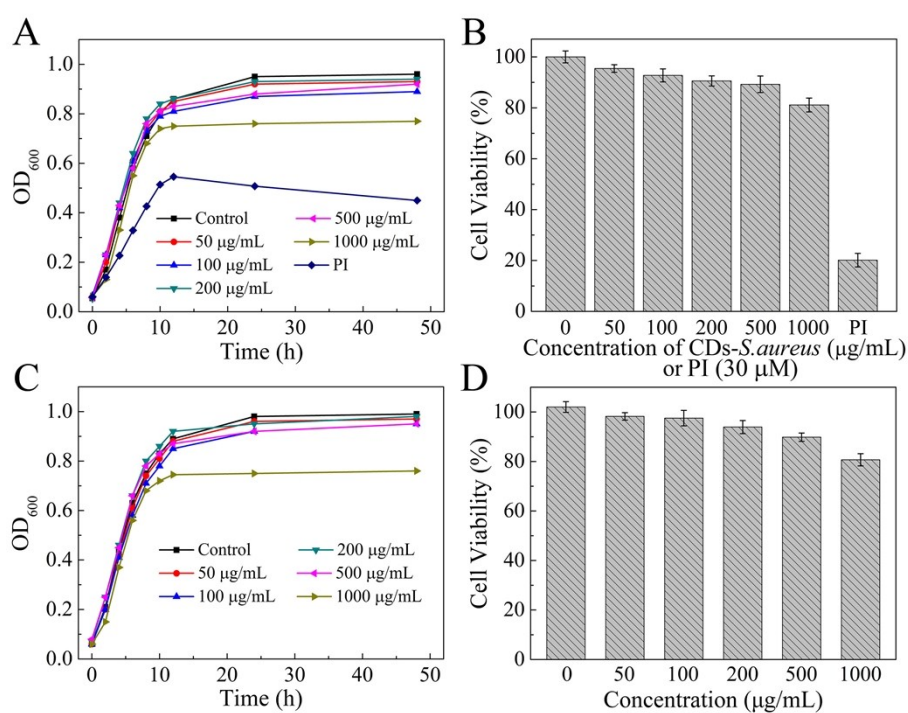

**Fig. S13** (A) Real-time cell growth monitoring of *S. aureus* bacteria and (B) colony unit forming counting assay for yeast cells (incubated with 30  $\mu\text{M}$  PI or different concentrations of CDs-*S. aureus*). (C) Real-time cell growth monitoring of *S. aureus* bacteria and (D) colony unit forming counting assay for yeast cells (incubated with different concentrations of CDs-*E. coli*).



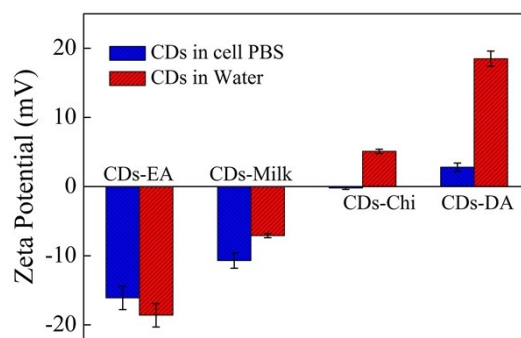

**Fig. S14** The zeta potential values of four types of CDs dissolved in cell PBS solution and pure water.
